# Supplementary material
Source: PubMed Central journal article supplement (PMC10243474)

## **Supplemental Material**

**Table 1:** Comparison of survivors and non survivors within the MI study subcohort

**Table 2:** Comparison of survivors and non survivors within the HF study subcohort

**Table 3:** Baseline descriptive statistics of CSWG study population with available baseline lactate by Revised SCAI stage

**Figure 1:** Sensitivity analysis of alternate SCAI Stage definition and application in CSWG study cohort utilizing baseline lactate values. A. table depicting how alternate SCAI stages were assigned in the applicable study cohort B. Distribution of alternate SCAI stages among applicable study cohort C. In hospital mortality of alternate SCAI stages compared to mortality of existing SCAI stages

**Figure 2:** Outcomes among MI and HF survivors

**Figure 3:** Mortality Related to Escalating Drug and Device Therapies. \*\*\*\* ( $p < 0.001$ ) represents statistical difference across treatment levels within each CS etiology. # ( $p < 0.05$ ) represents statistical difference between MI and HF patients at each treatment level

**Table 1:** Comparison of survivors and non survivors within the MI study subcohort

|                             | Mortality         |             |                       |          | p-value     |           |       |
|-----------------------------|-------------------|-------------|-----------------------|----------|-------------|-----------|-------|
|                             | Survivors (n=299) |             | Non-Survivors (n=195) |          |             |           |       |
|                             | n                 | %           | n                     | %        |             |           |       |
| <b>SCAI Stage</b>           |                   |             |                       |          | <0.001      |           |       |
| B                           | 0                 | 0           | 0                     | 0        |             |           |       |
| C                           | 52                | 35.4        | 23                    | 16.3     |             |           |       |
| D                           | 58                | 39.5        | 56                    | 39.7     |             |           |       |
| E                           | 37                | 25.2        | 62                    | 44.0     |             |           |       |
| <b># Pressors/Inotropes</b> |                   |             |                       |          | <0.001      |           |       |
| 0                           | 73                | 27.0        | 13                    | 7.0      |             |           |       |
| 1                           | 76                | 28.2        | 39                    | 20.9     |             |           |       |
| 2+                          | 121               | 44.8        | 135                   | 72.2     |             |           |       |
| <b># MCS Devices</b>        |                   |             |                       |          | <0.001      |           |       |
| 0                           | 15                | 5.0         | 6                     | 3.1      |             |           |       |
| 1                           | 200               | 66.9        | 94                    | 48.2     |             |           |       |
| 2+                          | 84                | 28.1        | 95                    | 48.7     |             |           |       |
| <b>MCS Type</b>             |                   |             |                       |          |             |           |       |
| Impella                     | 106               | 35.5        | 104                   | 53.3     | <0.001      |           |       |
| ECMO                        | 77                | 25.8        | 92                    | 47.2     | <0.001      |           |       |
| IABP                        | 193               | 64.6        | 99                    | 50.8     | <0.001      |           |       |
| <b>Gender</b>               |                   |             |                       |          | 0.918       |           |       |
| Female                      | 93                | 31.1        | 60                    | 30.8     |             |           |       |
| Male                        | 205               | 68.6        | 135                   | 69.2     |             |           |       |
| <b>Race</b>                 |                   |             |                       |          | 0.290       |           |       |
| White                       | 114               | 38.1        | 61                    | 31.3     |             |           |       |
| Hispanic/Latino             | 12                | 4.0         | 4                     | 2.1      |             |           |       |
| Asian                       | 14                | 4.7         | 4                     | 2.1      |             |           |       |
| African-American            | 4                 | 1.3         | 4                     | 2.1      |             |           |       |
| Other                       | 7                 | 2.3         | 8                     | 4.1      |             |           |       |
| <b>Medical History</b>      |                   |             |                       |          |             |           |       |
| HTN                         | 184               | 61.5        | 137                   | 70.3     | 0.075       |           |       |
| Diabetes                    | 126               | 42.1        | 94                    | 48.2     | 0.193       |           |       |
| Afib/Flutter                | 22                | 7.4         | 15                    | 7.7      | 0.481       |           |       |
| CKD (any stage)             | 42                | 14.0        | 42                    | 21.5     | 0.004       |           |       |
| PVD                         | 16                | 5.4         | 11                    | 5.6      | 0.335       |           |       |
| COPD                        | 14                | 4.7         | 13                    | 6.7      | 0.337       |           |       |
| CVA/TIA                     | 36                | 12.0        | 24                    | 12.3     | 0.983       |           |       |
| Valvular Disease            | 16                | 5.4         | 8                     | 4.1      | 0.821       |           |       |
| PCI                         | 90                | 30.1        | 70                    | 35.9     | 0.343       |           |       |
| CABG                        | 17                | 5.7         | 23                    | 11.8     | 0.016       |           |       |
| VT                          | 21                | 7.0         | 16                    | 8.2      | 0.280       |           |       |
| ICD                         | 12                | 4.0         | 3                     | 1.5      | 0.191       |           |       |
| CRT                         | 4                 | 1.3         | 6                     | 3.1      | 0.100       |           |       |
|                             | <b>n</b>          | <b>Mean</b> | <b>SD</b>             | <b>n</b> | <b>Mean</b> | <b>SD</b> |       |
| <b>Demographic</b>          |                   |             |                       |          |             |           |       |
| Age                         | 298               | 64.0        | 13.1                  | 195      | 66.3        | 12.4      | 0.045 |
| Weight (kg)                 | 254               | 83.2        | 19.5                  | 149      | 83.3        | 19.7      | 0.978 |
| <b>Metabolic</b>            |                   |             |                       |          |             |           |       |
| AST                         | 200               | 393.3       | 1068.2                | 145      | 524.7       | 1062.5    | 0.269 |

|                    |     |      |      |     |      |      |        |
|--------------------|-----|------|------|-----|------|------|--------|
| BUN                | 255 | 26.2 | 16.1 | 161 | 31.6 | 19.7 | 0.002  |
| Lactate            | 151 | 3.7  | 3.2  | 141 | 5.7  | 4.7  | <0.001 |
| HCO3               | 218 | 21.1 | 4.6  | 149 | 18.8 | 4.9  | <0.001 |
| Serum Creatinine   | 271 | 1.5  | 1.1  | 177 | 1.9  | 1.3  | <0.001 |
| pH                 | 167 | 7.3  | 0.1  | 139 | 7.2  | 0.2  | <0.001 |
| <b>Hemodynamic</b> |     |      |      |     |      |      |        |
| Admission EF       | 158 | 31.7 | 15.3 | 102 | 29.7 | 16.9 | 0.327  |
| RAP                | 188 | 13.7 | 5.6  | 115 | 16.0 | 7.6  | 0.002  |
| PCWP               | 163 | 23.8 | 9.0  | 108 | 24.7 | 9.5  | 0.441  |
| Mean PAP           | 161 | 29.9 | 8.5  | 96  | 30.7 | 9.8  | 0.510  |
| Cardiac Output     | 194 | 3.8  | 2.3  | 135 | 3.7  | 1.7  | 0.545  |
| CPO                | 182 | 0.7  | 0.5  | 132 | 0.6  | 0.3  | 0.255  |
| Heart Rate         | 252 | 89.5 | 22.5 | 155 | 93.9 | 23.6 | 0.064  |
| Cardiac Index      | 200 | 1.9  | 0.6  | 135 | 1.8  | 0.6  | 0.384  |
| MAP                | 254 | 77.3 | 17.2 | 179 | 70.8 | 15.8 | <0.001 |

p-values calculated using chi-sq test of independence or t-test as appropriate. Abbreviations: Afib: Atrial fibrillation; AST: aspartate aminotransferase; BUN: blood urea nitrogen; CABG: coronary artery bypass grafting; CKD: chronic kidney disease; COPD: chronic obstructive pulmonary disease; CPO: cardiac power output; CRT: cathode-ray tube; CVA: cerebrovascular accident; HCO3: Bicarbonate; HTN: Hypertension; ICD: implantable cardioverter defibrillator; MAP: mean arterial pressure; MI: myocardial infarction; PAP: pulmonary arterial pressure; PCI: percutaneous coronary intervention; PCWP: pulmonary capillary wedge pressure; PVD: peripheral vascular disease; RAP: right arterial pressure; TIA: transient ischemic attack; VT: ventricular tachycardia

**Table 2:** Comparison of survivors and non survivors within the HF study subcohort

|                             | Mortality         |      |                       |      | p-value |
|-----------------------------|-------------------|------|-----------------------|------|---------|
|                             | Survivors (n=532) |      | Non-Survivors (n=180) |      |         |
|                             | n                 | %    | n                     | %    |         |
| <b>SCAI Stage</b>           |                   |      |                       |      | 0.002   |
| B                           | 1                 | 0.6  | 0                     | 0    |         |
| C                           | 92                | 57.5 | 47                    | 36.2 |         |
| D                           | 41                | 25.6 | 44                    | 33.9 |         |
| E                           | 26                | 16.3 | 39                    | 30.0 |         |
| <b># Pressors/Inotropes</b> |                   |      |                       |      | <0.001  |
| 0                           | 102               | 20.3 | 17                    | 9.8  |         |
| 1                           | 196               | 39.0 | 45                    | 26.0 |         |
| 2+                          | 205               | 40.8 | 111                   | 64.2 |         |
| <b># MCS Devices</b>        |                   |      |                       |      | <0.001  |
| 0                           | 151               | 28.4 | 10                    | 5.6  |         |
| 1                           | 338               | 63.5 | 127                   | 70.6 |         |
| 2+                          | 43                | 8.1  | 43                    | 23.9 |         |
| <b>Type of MCS</b>          |                   |      |                       |      |         |
| Impella                     | 81                | 15.2 | 67                    | 37.2 | <0.001  |
| ECMO                        | 48                | 9.0  | 58                    | 32.2 | <0.001  |
| IABP                        | 294               | 55.3 | 88                    | 48.9 | 0.14    |
| <b>Gender</b>               |                   |      |                       |      | 0.285   |
| Female                      | 121               | 22.7 | 48                    | 26.7 |         |
| Male                        | 411               | 77.3 | 132                   | 73.3 |         |
| <b>Race</b>                 |                   |      |                       |      | 0.023   |

|                        |          |             |           |          |             |
|------------------------|----------|-------------|-----------|----------|-------------|
| White                  | 236      | 44.4        | 85        | 47.2     |             |
| Hispanic/Latino        | 3        | 0.6         | 4         | 2.2      |             |
| Asian                  | 2        | 0.4         | 2         | 1.1      |             |
| African-American       | 9        | 1.7         | 4         | 2.2      |             |
| Other                  | 50       | 9.4         | 5         | 2.8      |             |
| <b>Medical History</b> |          |             |           |          |             |
| HTN                    | 178      | 33.5        | 98        | 54.4     | <0.001      |
| Diabetes               | 152      | 28.6        | 70        | 38.9     | 0.010       |
| Afib/Flutter           | 162      | 30.5        | 65        | 36.1     | 0.246       |
| CKD (any stage)        | 151      | 28.4        | 56        | 31.1     | 0.875       |
| PVD                    | 13       | 2.4         | 9         | 5.0      | 0.050       |
| COPD                   | 45       | 8.5         | 17        | 9.4      | 0.989       |
| CVA/TIA                | 66       | 12.4        | 22        | 12.2     | 0.506       |
| Valvular Disease       | 120      | 22.6        | 34        | 18.9     | 0.567       |
| PCI                    | 71       | 13.3        | 30        | 16.7     | 0.236       |
| CABG                   | 32       | 6.0         | 28        | 15.6     | <0.001      |
| VT                     | 105      | 19.7        | 49        | 27.2     | 0.054       |
| ICD                    | 217      | 40.8        | 70        | 38.9     | 0.339       |
| CRT                    | 65       | 12.2        | 21        | 11.7     | 0.689       |
|                        | <b>n</b> | <b>Mean</b> | <b>SD</b> | <b>n</b> | <b>Mean</b> |
| <b>Demographic</b>     |          |             |           |          |             |
| Age                    | 532      | 56.6        | 14.1      | 180      | 61.6        |
| Weight (kg)            | 402      | 86.3        | 24.7      | 132      | 87.1        |
| <b>Metabolic</b>       |          |             |           |          |             |
| AST                    | 241      | 283.7       | 1485.3    | 87       | 878.2       |
| BUN                    | 331      | 34.8        | 20.7      | 125      | 45.2        |
| Lactate                | 173      | 3.0         | 2.9       | 134      | 4.9         |
| HCO3                   | 254      | 25.3        | 4.9       | 76       | 21.2        |
| Serum Creatinine       | 515      | 1.8         | 1.0       | 172      | 2.2         |
| pH                     | 98       | 7.4         | 0.1       | 81       | 7.3         |
| <b>Hemodynamic</b>     |          |             |           |          |             |
| Admission EF           | 302      | 19.2        | 11.0      | 127      | 22.6        |
| RAP                    | 481      | 12.9        | 6.8       | 145      | 17.5        |
| PCWP                   | 370      | 24.2        | 9.0       | 116      | 26.8        |
| Mean PAP               | 435      | 34.2        | 9.9       | 114      | 35.0        |
| Cardiac Output         | 480      | 3.6         | 1.6       | 150      | 4.4         |
| CPO                    | 451      | 0.6         | 0.3       | 133      | 0.7         |
| Heart Rate             | 508      | 91.2        | 21.7      | 152      | 95.5        |
| Cardiac Index          | 487      | 1.8         | 0.5       | 148      | 1.9         |
| MAP                    | 476      | 75.2        | 11.9      | 152      | 70.1        |

p-values calculated using chi-sq test of independence or t-test as appropriate. Abbreviations: Afib: Atrial fibrillation; AST: aspartate aminotransferase; BUN: blood urea nitrogen; CABG: coronary artery bypass grafting; CKD: chronic kidney disease; COPD: chronic obstructive pulmonary disease; CPO: cardiac power output; CRT: cathode-ray tube; CVA: cerebrovascular accident; HCO3: Bicarbonate; HF: heart failure; HTN: Hypertension; ICD: implantable cardioverter defibrillator; MAP: mean arterial pressure; PAP: pulmonary arterial pressure; PCI: percutaneous coronary intervention; PCWP: pulmonary capillary wedge pressure; PVD: peripheral vascular disease; RAP: right arterial pressure; TIA: transient ischemic attack; VT: ventricular tachycardia

**Table 3:** Baseline descriptive statistics of CSWG study population with available baseline lactate by Revised SCAI stage

|                             | SCAI Stage  |        |         |         |           |         |           |        |           |        | P-value |
|-----------------------------|-------------|--------|---------|---------|-----------|---------|-----------|--------|-----------|--------|---------|
|                             | All (N=645) |        | B (n=1) |         | C (n=232) |         | D (n=220) |        | E (n=192) |        |         |
|                             | n           | (%)    | n       | (%)     | n         | (%)     | n         | (%)    | n         | (%)    |         |
| <b>Non-Survivors</b>        | 292         | (45.3) | 0       | (0)     | 75        | (32.3)  | 107       | (48.6) | 110       | (57.9) | <0.001  |
| <b>Male</b>                 | 451         | (69.9) | 0       | (0)     | 160       | (69.0)  | 159       | (72.3) | 132       | (68.8) | 0.37    |
| <b>Shock Etiology</b>       |             |        |         |         |           |         |           |        |           |        | <0.001  |
| MI                          | 288         | (44.8) | 0       | (4.4)   | 75        | (32.33) | 114       | (51.8) | 99        | (52.1) |         |
| HF                          | 290         | (45.1) | 1       | (100)   | 139       | (59.9)  | 85        | (38.6) | 65        | (34.2) |         |
| Other                       | 65          | (10.1) | 0       | (0)     | 18        | (7.8)   | 21        | (9.6)  | 26        | (13.7) |         |
| <b># Pressors/Inotropes</b> |             |        |         |         |           |         |           |        |           |        | <0.001  |
| 0                           | 64          | (10.2) | 1       | (100.0) | 44        | (19.0)  | 3         | (1.4)  | 16        | (9.1)  |         |
| 1                           | 168         | (26.7) | 0       | (0)     | 82        | (35.3)  | 54        | (24.6) | 32        | (18.8) |         |
| 2+                          | 397         | (63.1) | 0       | (0)     | 108       | (45.7)  | 163       | (74.1) | 128       | (72.7) |         |
| <b># Devices</b>            |             |        |         |         |           |         |           |        |           |        | <0.001  |
| 0                           | 32          | (5.0)  | 1       | (100.0) | 16        | (6.9)   | 5         | (2.3)  | 10        | (5.2)  |         |
| 1                           | 388         | (60.2) | 0       | (0)     | 192       | (82.8)  | 102       | (46.4) | 94        | (49.0) |         |
| 2 +                         | 225         | (34.9) | 0       | (0)     | 24        | (10.3)  | 113       | (51.4) | 88        | (45.8) |         |
| <b>Type of MCS</b>          |             |        |         |         |           |         |           |        |           |        |         |
| Impella                     | 240         | (37.2) | 0       | (0)     | 71        | (30.6)  | 98        | (44.6) | 71        | (37.0) | 0.02    |
| ECMO                        | 248         | (38.5) | 0       | (0)     | 31        | (13.4)  | 106       | (48.2) | 111       | (57.8) | <0.001  |
| IABP                        | 365         | (56.6) | 0       | (0)     | 141       | (60.8)  | 129       | (58.6) | 95        | (49.5) | 0.06    |
| <b>Race</b>                 |             |        |         |         |           |         |           |        |           |        | 0.86    |
| White                       | 259         | (82.5) | 1       | (100.0) | 82        | (79.6)  | 97        | (88.2) | 79        | (79.0) |         |
| Hispanic/Latino             | 13          | (4.1)  | 0       | (0)     | 4         | (3.9)   | 5         | (4.6)  | 4         | (4.0)  |         |
| African-American            | 14          | (4.5)  | 0       | (0)     | 5         | (4.9)   | 4         | (3.6)  | 5         | (5.0)  |         |
| Asian                       | 11          | (3.5)  | 0       | (0)     | 5         | (4.9)   | 2         | (3.6)  | 5         | (5.0)  |         |
| Other                       | 17          | (5.4)  | 0       | (0)     | 7         | (6.8)   | 2         | (1.8)  | 8         | (8.0)  |         |
| <b>Medical History</b>      |             |        |         |         |           |         |           |        |           |        |         |
| HTN                         | 344         | (57.1) | 0       | (0)     | 113       | (56.2)  | 128       | (60.1) | 103       | (55.1) | 0.48    |
| DM2                         | 234         | (36.5) | 1       | (100.0) | 86        | (37.2)  | 81        | (37.0) | 66        | (34.6) | 0.55    |
| Afib/Flutter                | 133         | (30.7) | 1       | (100.0) | 43        | (26.9)  | 54        | (36.0) | 35        | (28.7) | 0.13    |
| CKD (any stage)             | 136         | (25.9) | 1       | (100.0) | 61        | (31.3)  | 39        | (22.0) | 35        | (23.0) | 0.05    |
| PVD                         | 23          | (5.4)  | 0       | (0)     | 9         | (5.5)   | 7         | (5.0)  | 7         | (5.7)  | 0.99    |
| COPD                        | 44          | (7.3)  | 1       | (100.0) | 12        | (5.9)   | 22        | (10.3) | 9         | (4.9)  | <0.001  |
| CVA/TIA                     | 64          | (10.8) | 0       | (0)     | 19        | (9.4)   | 29        | (13.6) | 16        | (9.1)  | 0.43    |
| Valvular Disease            | 75          | (19.1) | 1       | (100.0) | 37        | (24.2)  | 18        | (13.7) | 19        | (17.8) | 0.03    |
| PCI                         | 166         | (37.1) | 0       | (0)     | 35        | (27.1)  | 65        | (38.0) | 66        | (45.2) | 0.02    |
| CABG                        | 55          | (10.7) | 0       | (0)     | 25        | (15.5)  | 17        | (9.0)  | 13        | (7.9)  | 0.12    |
| VT                          | 97          | (22.4) | 0       | (0)     | 35        | (21.9)  | 28        | (18.7) | 34        | (28.9) | 0.31    |
| ICD                         | 123         | (28.5) | 0       | (0)     | 50        | (31.3)  | 46        | (30.5) | 27        | (22.5) | 0.33    |

| CRT                | 47  | (10.9) | 0      | (0) | 17    | (10.6) | 23  | (15.2) | 7      | (5.9) | 0.10  |        |     |        |        |        |
|--------------------|-----|--------|--------|-----|-------|--------|-----|--------|--------|-------|-------|--------|-----|--------|--------|--------|
|                    | n   | Mean   | SD     | n   | Mean  | SD     | n   | Mean   | SD     | n     | Mean  | SD     |     |        |        |        |
| <b>Demographic</b> |     |        |        |     |       |        |     |        |        |       |       |        |     |        |        |        |
| Age                | 645 | 59.7   | 14.3   | 1   | 69.0  | -      | 232 | 60.1   | 13.6   | 220   | 59.1  | 14.1   | 192 | 59.9   | 15.5   | 0.78   |
| Weight (kg)        | 488 | 84.6   | 22.3   | 1   | 123.8 | -      | 187 | 86.2   | 25.1   | 160   | 82.2  | 18.0   | 140 | 84.86  | 22.5   | 0.12   |
| <b>Metabolic</b>   |     |        |        |     |       |        |     |        |        |       |       |        |     |        |        |        |
| AST                | 445 | 713.3  | 1932.3 | 1   | 45.0  | -      | 123 | 354.6  | 1368.1 | 170   | 493.6 | 1185.9 | 151 | 1257.4 | 2735.6 | <0.001 |
| BUN                | 515 | 34.0   | 21.0   | 1   | 43.0  | -      | 150 | 36.8   | 34.4   | 196   | 35.8  | 20.9   | 168 | 30.0   | 17.1   | 0.01   |
| Lactate            | 645 | 4.4    | 4.3    | 1   | 1.4   | -      | 232 | 1.5    | 0.72   | 220   | 2.9   | 1.1    | 192 | 9.8    | 4.2    | <0.001 |
| HCO3               | 412 | 20.2   | 5.6    | 1   | 34.0  | -      | 116 | 23.0   | 5.0    | 151   | 20.8  | 4.9    | 144 | 17.1   | 5.1    | <0.001 |
| Serum Creatinine   | 636 | 1.9    | 1.2    | 1   | 1.1   | -      | 230 | 1.9    | 1.3    | 218   | 2.0   | 1.1    | 187 | 1.9    | 1.1    | 0.83   |
| pH                 | 426 | 7.3    | 0.1    | 1   | 7.5   | -      | 103 | 7.4    | 0.1    | 160   | 7.3   | 0.1    | 162 | 7.2    | 0.2    | <0.001 |
| <b>Hemodynamic</b> |     |        |        |     |       |        |     |        |        |       |       |        |     |        |        |        |
| Admission EF (%)   | 394 | 24.1   | 16.3   | 0   | -     | -      | 171 | 22.9   | 14.2   | 121   | 25.6  | 16.3   | 102 | 28.5   | 18.8   | 0.02   |
| RAP                | 499 | 16.0   | 6.9    | 1   | 11.0  | -      | 192 | 15.7   | 7.7    | 176   | 15.4  | 6.1    | 130 | 17.2   | 6.6    | 0.11   |
| PCWP               | 389 | 25.6   | 9.3    | 1   | 14.0  | -      | 139 | 26.4   | 9.3    | 133   | 25.2  | 9.0    | 116 | 25.3   | 9.5    | 0.39   |
| Mean PAP           | 518 | 32.9   | 10.4   | 1   | 22.7  | -      | 199 | 34.9   | 10.5   | 180   | 32.3  | 9.5    | 138 | 31.1   | 10.7   | 0.004  |
| CO                 | 514 | 4.0    | 3.1    | 1   | 4.7   | -      | 210 | 4.1    | 2.8    | 176   | 3.8   | 2.4    | 127 | 4.2    | 4.2    | 0.81   |
| CPO                | 484 | 0.64   | 0.5    | 1   | 0.7   | -      | 195 | 0.7    | 0.5    | 165   | 0.6   | 0.3    | 123 | 0.6    | 0.7    | 0.47   |
| Heart Rate         | 578 | 96.9   | 23.2   | 1   | 100.0 | -      | 206 | 96.7   | 19.8   | 193   | 97.3  | 23.6   | 178 | 96.7   | 26.4   | 0.99   |
| Cardiac Index      | 516 | 1.9    | 0.7    | 1   | 2.1   | -      | 207 | 1.9    | 0.7    | 179   | 1.8   | 0.6    | 129 | 1.8    | 0.7    | 0.37   |
| MAP                | 617 | 72.6   | 15.1   | 1   | 65.0  | -      | 224 | 71.1   | 14.3   | 209   | 71.1  | 15.1   | 183 | 69.2   | 14.9   | <0.001 |

p-values calculated using chi-sq test of independence or t-test as appropriate. Abbreviations: Afib: Atrial fibrillation; AST: aspartate aminotransferase; BUN: blood urea nitrogen; CABG: coronary artery bypass grafting; CKD: chronic kidney disease; COPD: chronic obstructive pulmonary disease; CPO: cardiac power output; CRT: cathode-ray tube; CVA: cerebrovascular accident; HCO3: Bicarbonate; HTN: Hypertension; ICD: implantable cardioverter defibrillator; MAP: mean arterial pressure; PAP: pulmonary arterial pressure; PCI: percutaneous coronary intervention; PCWP: pulmonary capillary wedge pressure; PVD: peripheral vascular disease; RAP: right arterial pressure; TIA: transient ischemic attack; VT: ventricular tachycardia

**Supplemental Figure 1**

**A**

| Revised SCAI Stages Definitions |                                          |
|---------------------------------|------------------------------------------|
| SCAI Stage                      | Revised Definition                       |
| B                               | Lactate < 2 plus<br>No Drugs or Devices  |
| C                               | Lactate < 5 plus<br><1 drug and 1 device |
| D                               | Lactate < 5 plus<br>>1 drug or >1 device |
| E                               | Lactate $\geq$ 5 only                    |

**B**

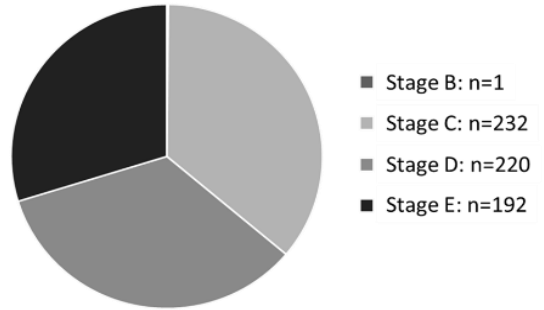

**C**

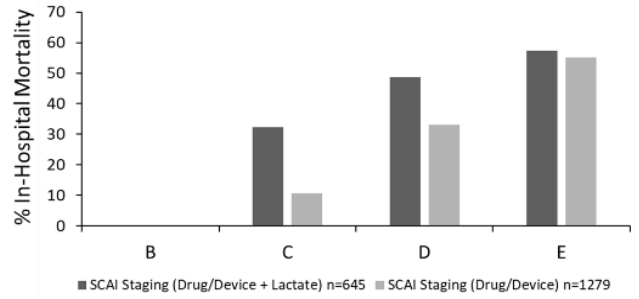

**Supplemental Figure 2**

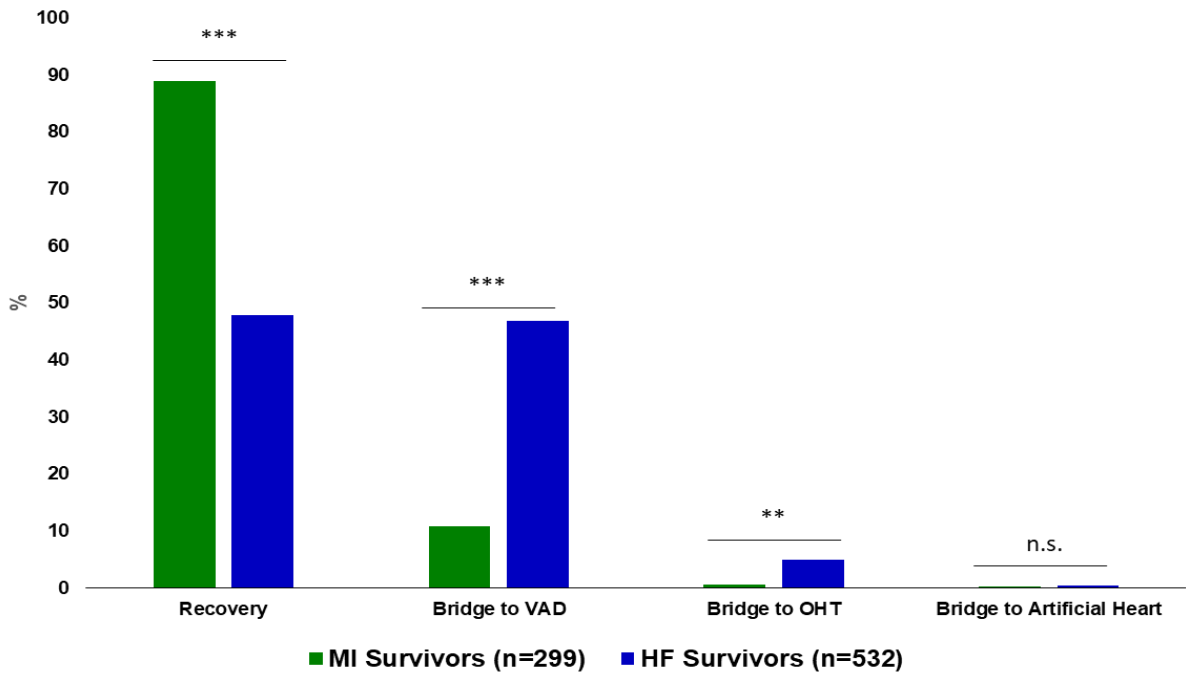

Supplemental Figure 3

All  
 MI  
 HF

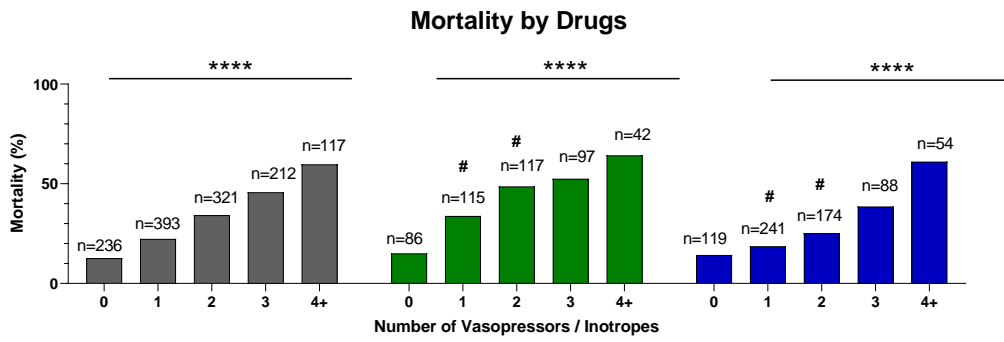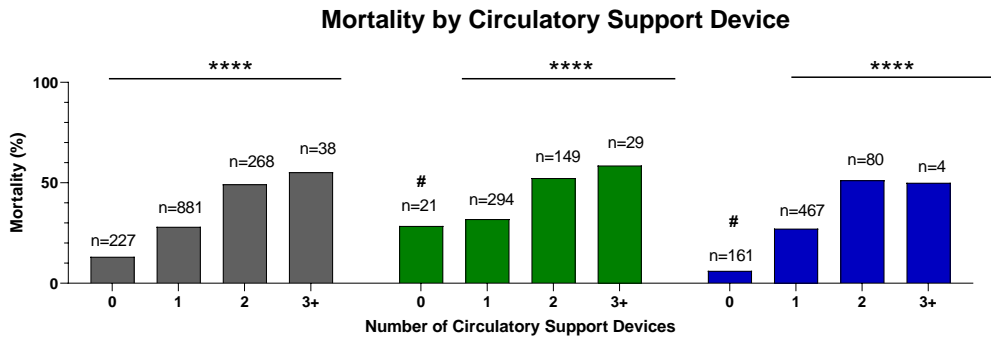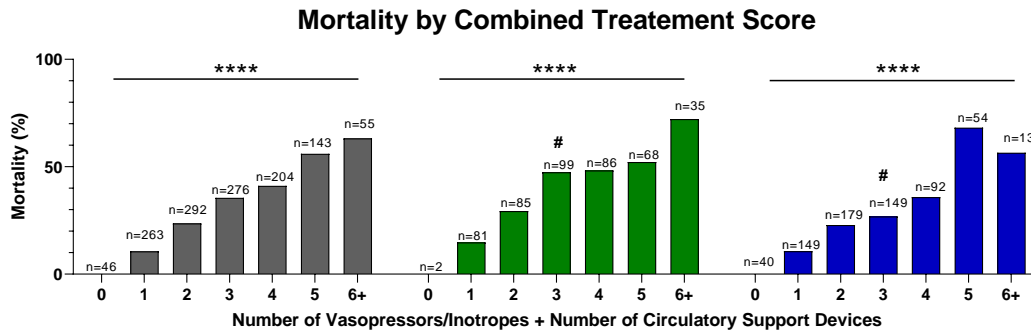

Supplement: NIHMS1617149-supplement-Supplemental_Material.pdf [file NIHMS1617149-supplement-Supplemental_Material.pdf]
